# Supplementary material
Source: PubMed Central journal article supplement (PMC9883720)

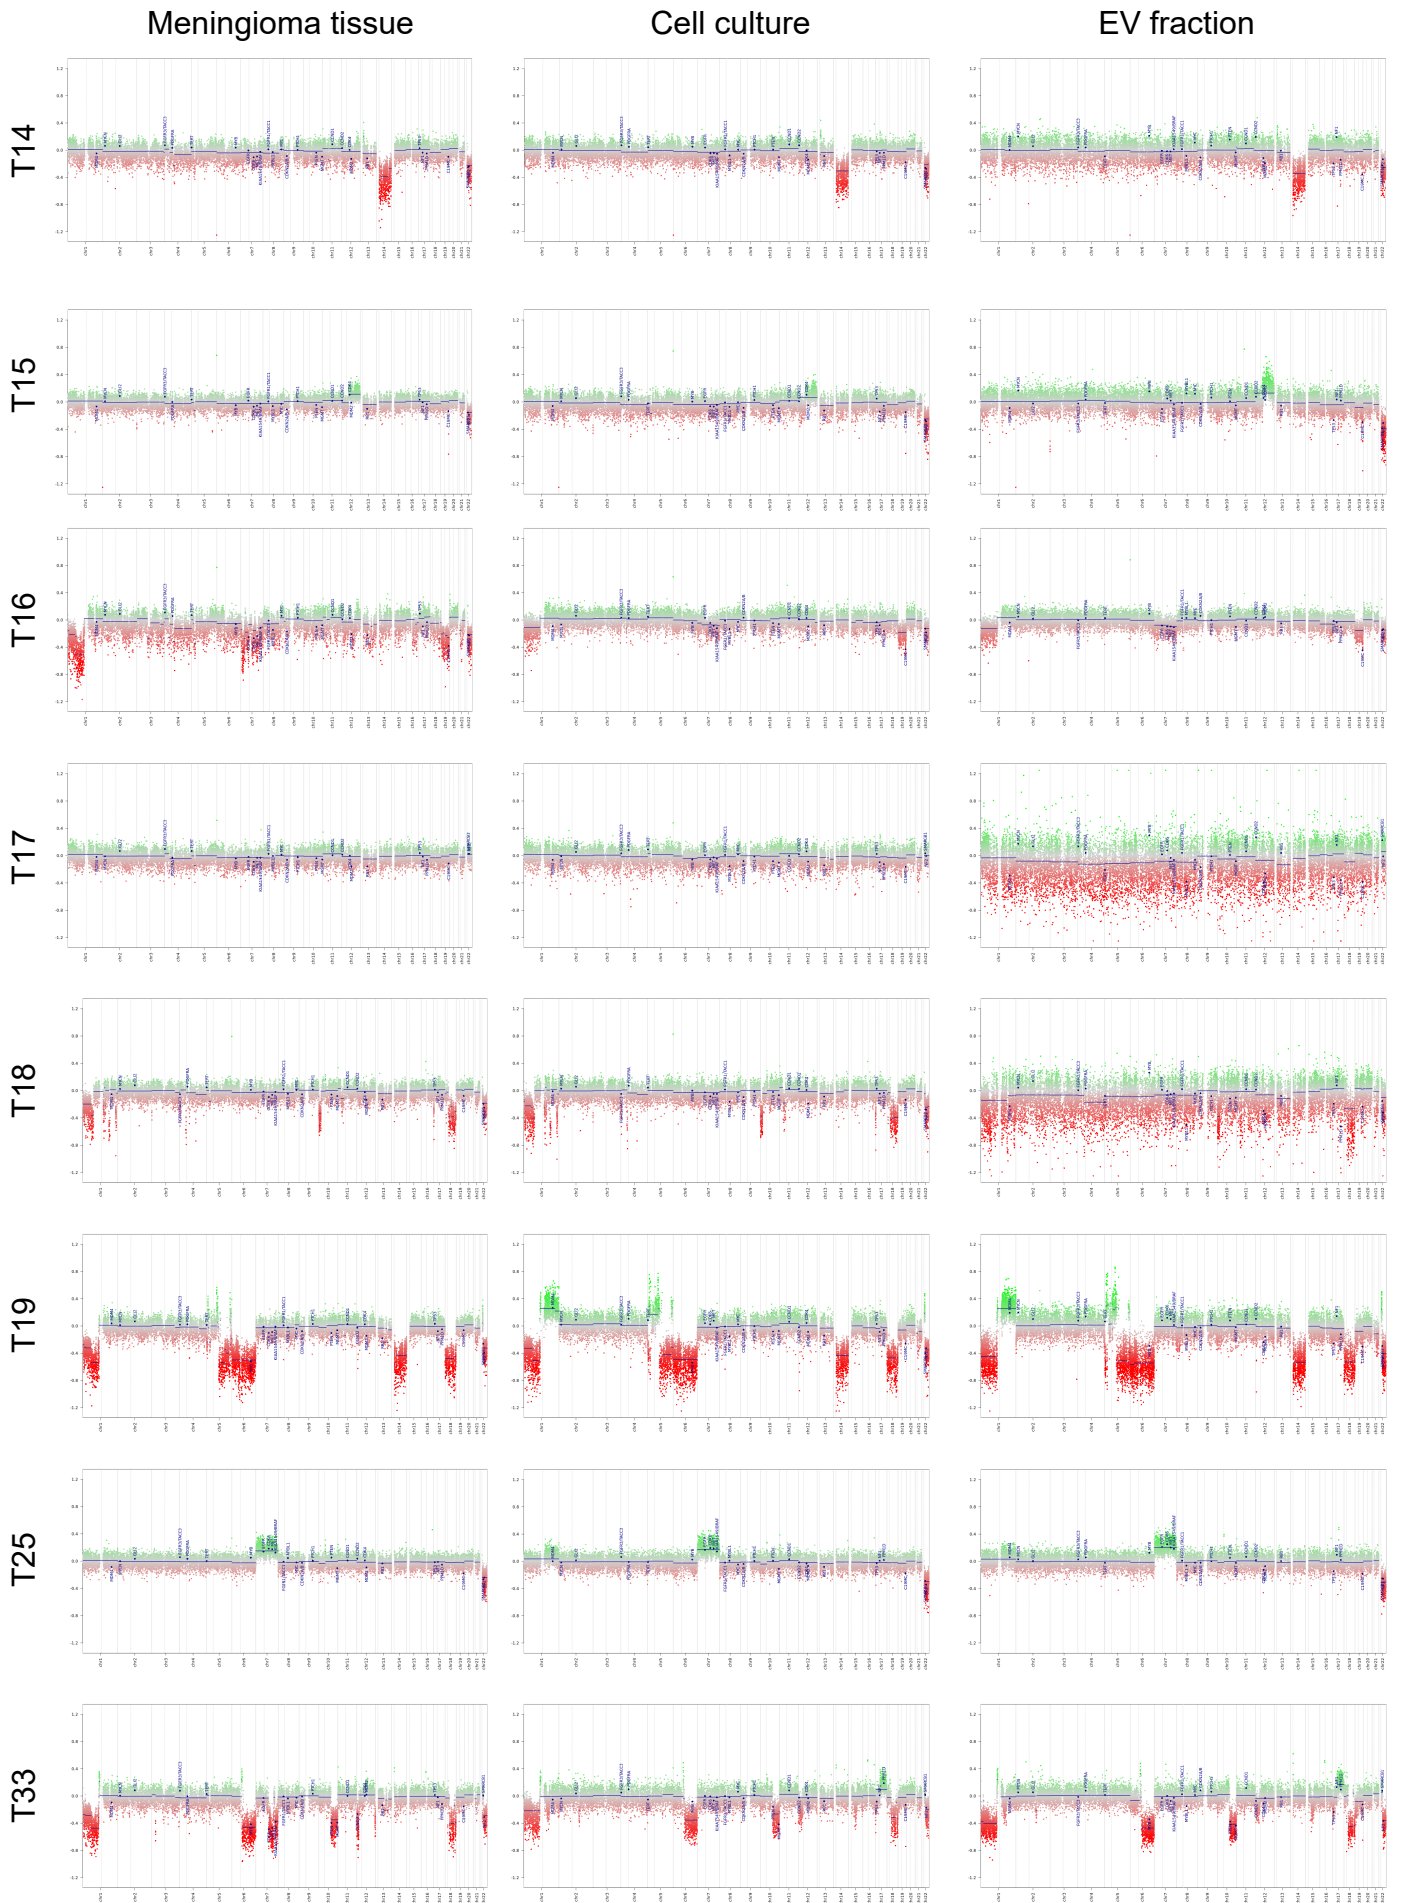

Supplementary Figure 2 (part 2)

Supplement: noac127_suppl_supplementary_figure_2.pdf [file noac127_suppl_supplementary_figure_2.pdf]

**A**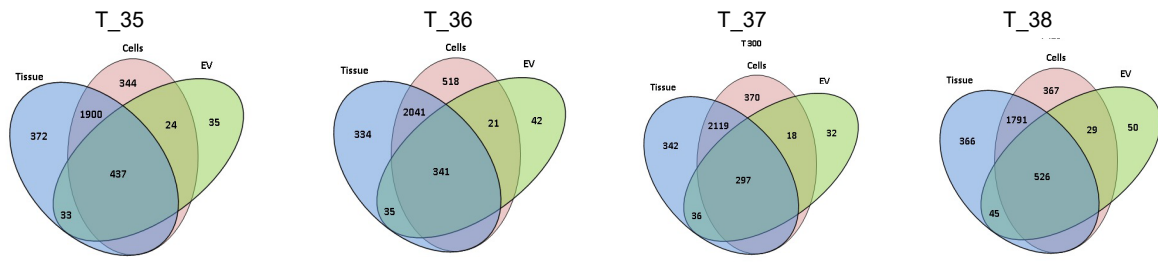**B**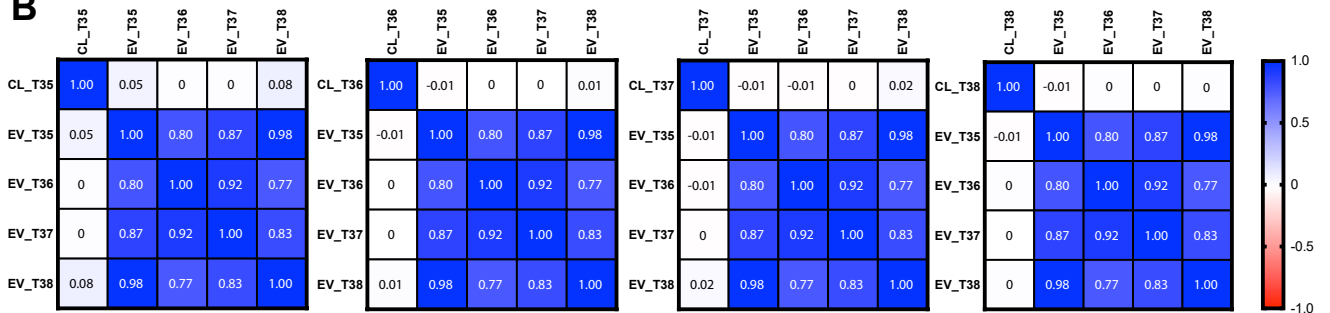**C**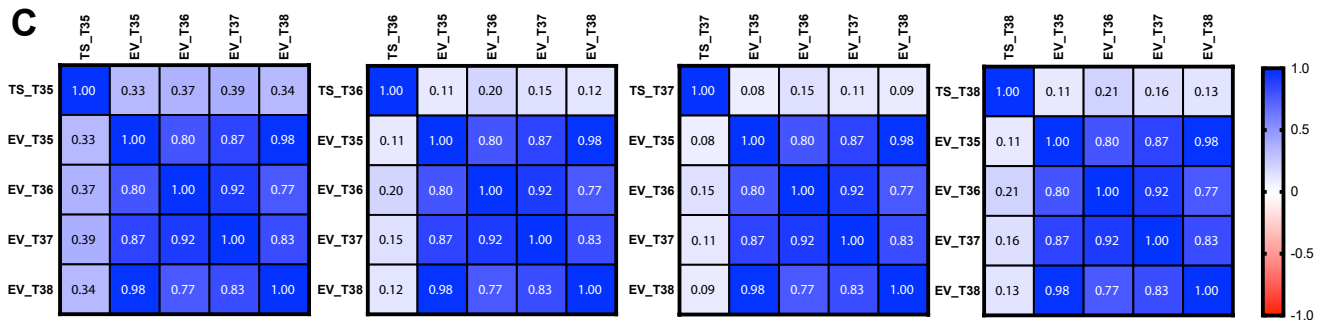**D**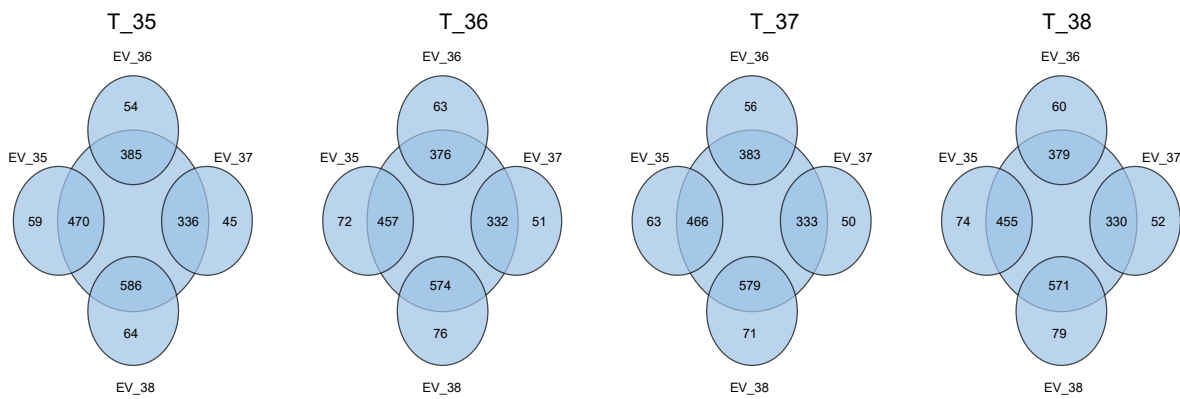

Supplementary Figure 3

Supplement: noac127_suppl_supplementary_figure_3.pdf [file noac127_suppl_supplementary_figure_3.pdf]

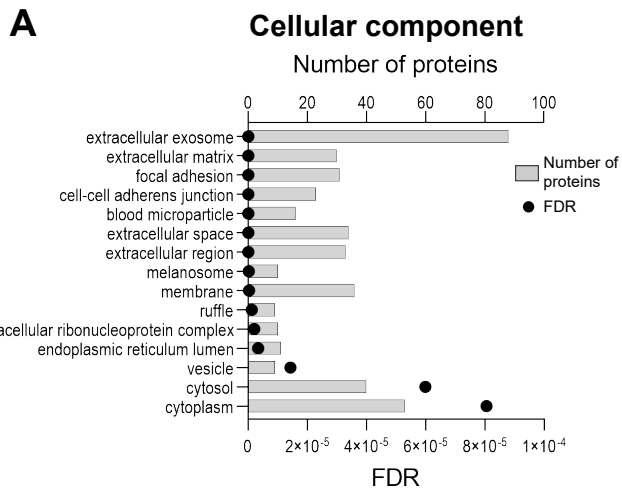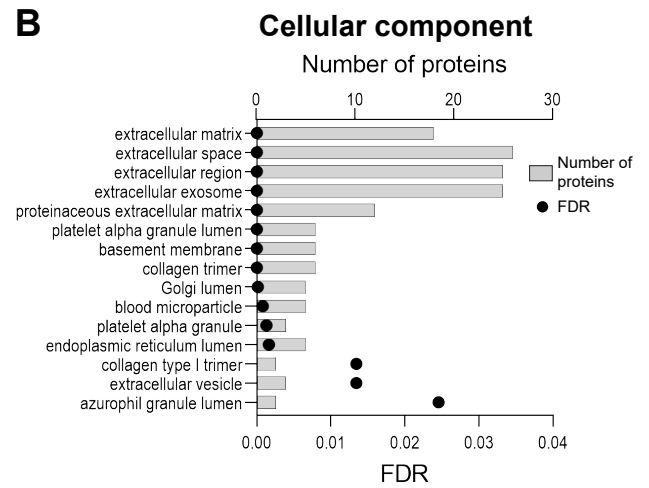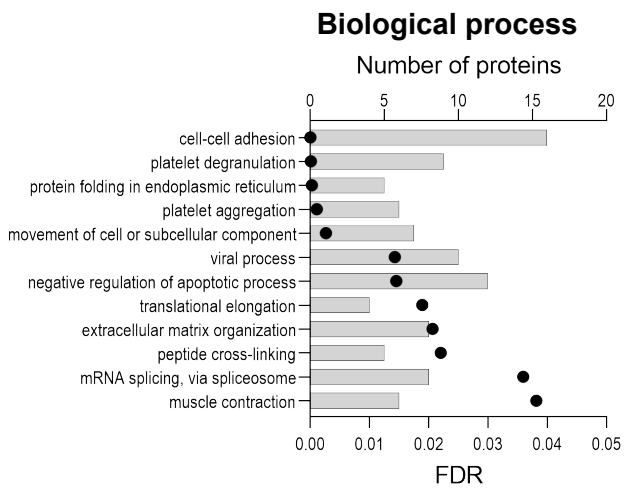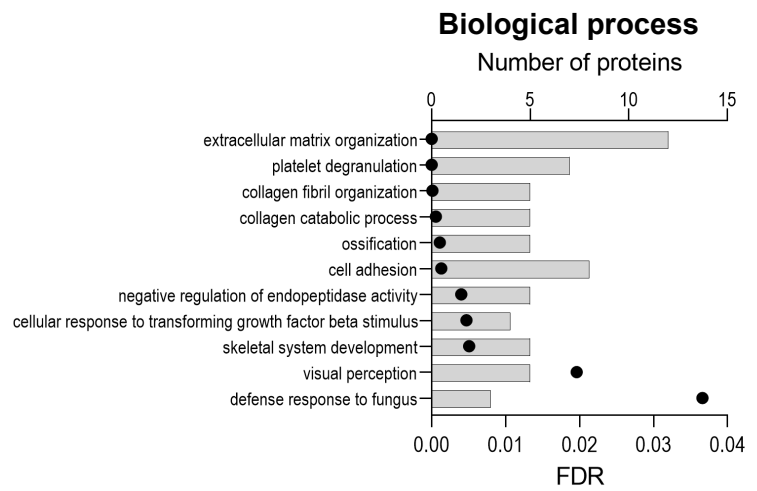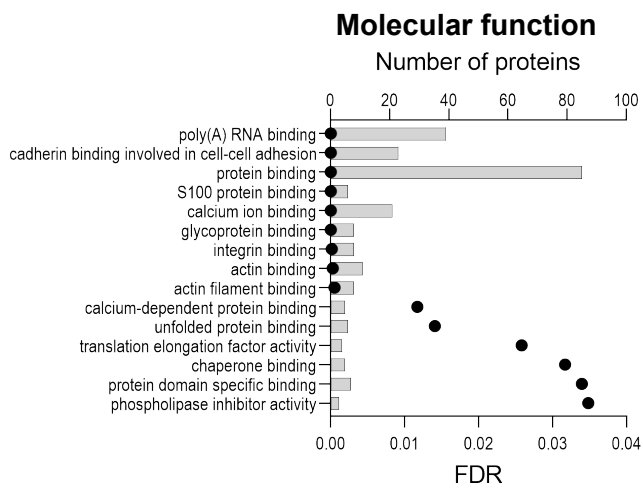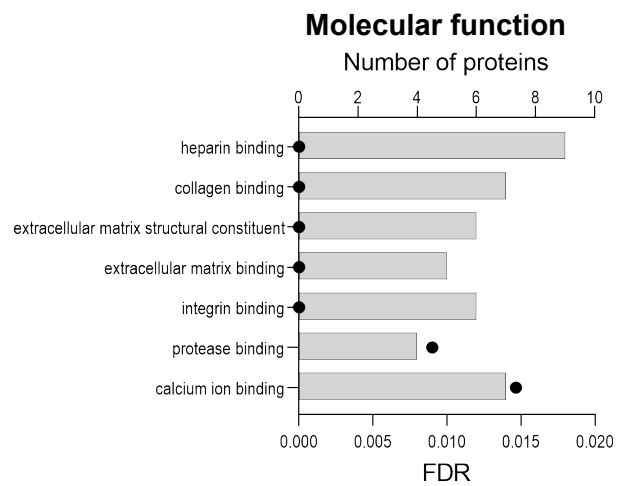

**Supplementary Figure 4**

Supplement: noac127_suppl_supplementary_figure_4.pdf [file noac127_suppl_supplementary_figure_4.pdf]
